# Supplementary material
Source: PubMed Central journal article supplement (PMC6306687)
Supplement: Supp_Fig1.pdf [file Supp_Fig1.pdf]

## Supplementary Data

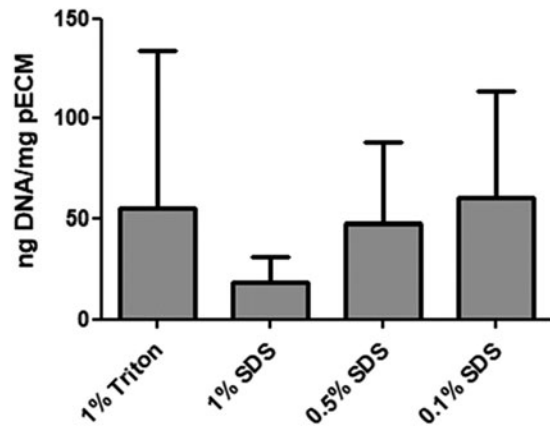

**SUPPLEMENTARY FIG. S1.** PicoGreen assay of undigested pECM hydrogels,  $n=3$ . pECM, pancreatic extracellular matrix.
