# Supplementary material
Source: PubMed Central journal article supplement (PMC6306687)
Supplement: Supp_Fig2.pdf [file Supp_Fig2.pdf]

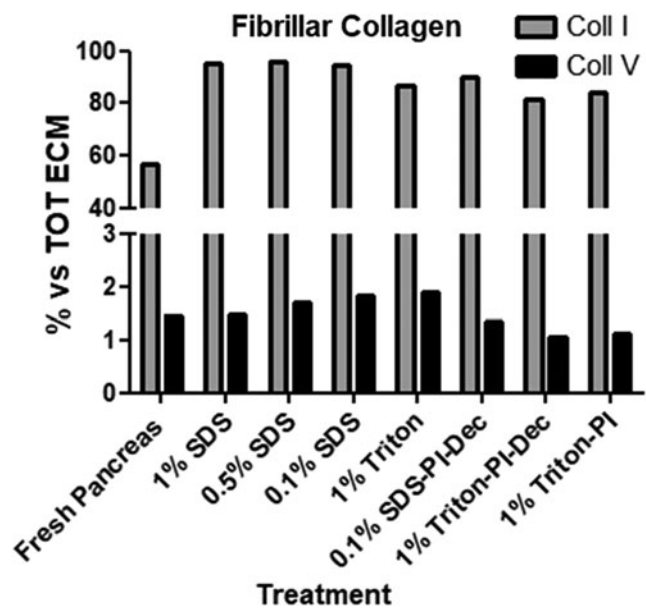

**SUPPLEMENTARY FIG. S2.** Quantitative proteomic analysis of the decellularized pECM hydrogels and fresh pancreas. Fibrillar collagen proteins.
