# Supplementary material
Source: PubMed Central journal article supplement (PMC6306687)
Supplement: Supp_Fig3.pdf [file Supp_Fig3.pdf]

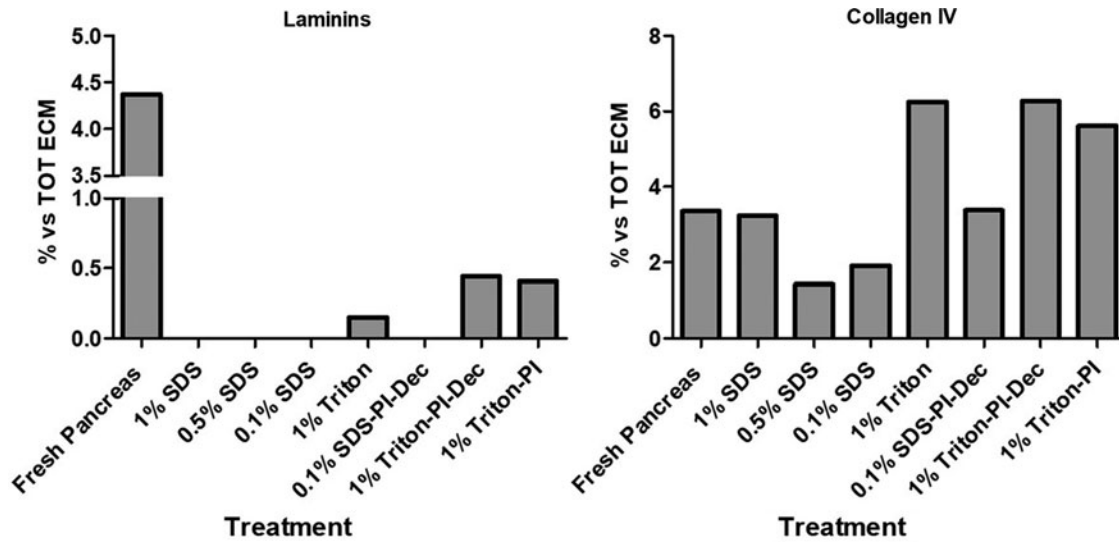

**SUPPLEMENTARY FIG. S3.** Quantitative proteomic analysis of the decellularized pECM hydrogels and fresh pancreas. Laminins and collagen IV proteins.
