# Supplementary material
Source: PubMed Central journal article supplement (PMC6306687)
Supplement: Supp_Fig4.pdf [file Supp_Fig4.pdf]

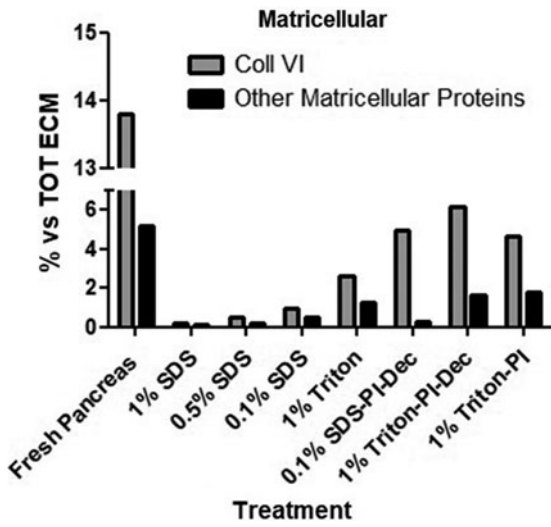

**SUPPLEMENTARY FIG. S4.** Quantitative proteomic analysis of the decellularized pECM hydrogels and fresh pancreas. Matricellular proteins.
