# Supplementary material
Source: PubMed Central journal article supplement (PMC6306687)
Supplement: Supp_Fig5.pdf [file Supp_Fig5.pdf]

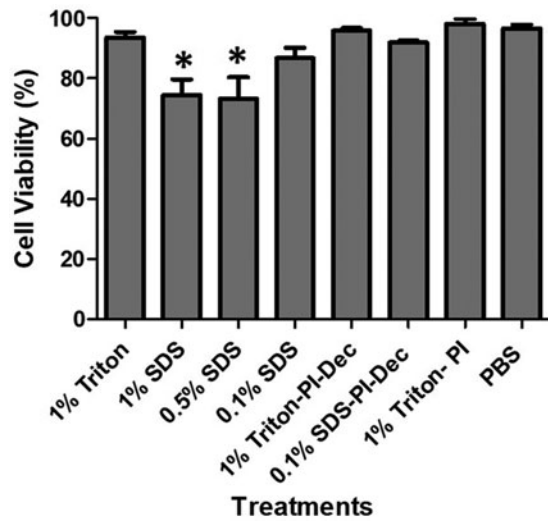

**SUPPLEMENTARY FIG. S5.** Viability assay of calcein-labeled INS1 cells 5 min after incubation with pECM hydrogels; \* $p \leq 0.05$  versus Triton and PBS groups. PBS, phosphate-buffered saline.
