# Supplementary material
Source: PubMed Central journal article supplement (PMC6306687)
Supplement: Supp_Table1.pdf [file Supp_Table1.pdf]

SUPPLEMENTARY TABLE S1. QUANTITATIVE PROTEOMIC ANALYSIS OF DECELLULARIZED PANCREATIC EXTRACELLULAR MATRIX HYDROGELS AND FRESH PANCREAS

| Protein                                             | Gene     | Functional classification | Fresh pancreas | % (vs. Total ECM proteins) |        |          |          |                  |                 |              |       |
|-----------------------------------------------------|----------|---------------------------|----------------|----------------------------|--------|----------|----------|------------------|-----------------|--------------|-------|
|                                                     |          |                           |                | 1% Triton SDS              | 1% SDS | 0.5% SDS | 0.1% SDS | 1% Triton-PI-Dec | 0.1% SDS-PI-Dec | 1% Triton-PI |       |
| Collagen alpha-1(IV) chain(arresten/core protein)   | COL4A1   | Basement membrane         | 1.24           | 1.23                       | —      | —        | —        | —                | 2.01            | —            | 1.68  |
| Collagen alpha-1/5(IV) chain(arresten/core protein) | COL4A1/5 | Basement membrane         | 1.37           | 4.36                       | 2.65   | 1.11     | 1.49     | —                | 3.24            | 2.53         | 3.08  |
| Collagen alpha-2(IV) chain(canstatin/core protein)  | COL4A2   | Basement membrane         | 0.74           | 0.67                       | 0.58   | 0.31     | 0.43     | —                | 1.03            | 0.84         | 0.86  |
| Laminin alpha-2                                     | LAMA2    | Basement membrane         | 0.30           | 0.04                       | —      | —        | —        | —                | 0.08            | —            | 0.07  |
| Laminin alpha-4                                     | LAMA4    | Basement membrane         | 0.18           | 0.01                       | —      | —        | —        | —                | 0.09            | —            | 0.08  |
| Laminin beta-1                                      | LAMB1    | Basement membrane         | 0.34           | 0.02                       | —      | —        | —        | —                | 0.08            | —            | 0.06  |
| Laminin beta-2                                      | LAMB2    | Basement membrane         | 0.07           | 0.02                       | —      | —        | —        | —                | 0.07            | —            | 0.08  |
| Laminin gamma-1                                     | LAMC1    | Basement membrane         | 3.49           | 0.06                       | —      | —        | —        | —                | 0.13            | —            | 0.12  |
| Nidogen 1/2 (osteonidogen)(Nid1/2)                  | NID1/2   | Basement membrane         | 1.29           | —                          | —      | —        | —        | —                | —               | —            | —     |
| Nidogen-1                                           | NID1     | Basement membrane         | 5.19           | 0.02                       | —      | —        | —        | —                | 0.09            | —            | 0.07  |
| Perlecan                                            | HSPG2    | Basement membrane         | 2.55           | —                          | —      | —        | —        | —                | —               | —            | —     |
| Agrin                                               | AGRN     | Basement membrane         | 0.01           | —                          | —      | —        | —        | —                | —               | —            | —     |
| Total basement membrane                             |          |                           | 16.76          | 6.43                       | 3.23   | 1.42     | 1.92     | —                | 6.81            | 3.38         | 6.09  |
| Collagen alpha-1(I) chain                           | COL1A1   | Fibrillar collagen        | 29.94          | 41.56                      | 61.08  | 59.17    | 54.46    | —                | 48.61           | 53.84        | 52.18 |
| Collagen alpha-1(I) chain(fragment)                 | COL1A1*  | Fibrillar collagen        | 9.30           | 13.69                      | 7.65   | 8.68     | 13.35    | —                | 10.92           | 11.00        | 9.40  |
| Collagen alpha-1(V) chain                           | COL5A1   | Fibrillar collagen        | 1.04           | 0.66                       | 0.75   | 0.95     | 1.27     | —                | 0.36            | 0.64         | 0.37  |
| Collagen alpha-2(I) chain                           | COL1A2   | Fibrillar collagen        | 17.82          | 31.48                      | 26.23  | 28.36    | 26.94    | —                | 22.13           | 25.00        | 22.40 |
| Collagen alpha-2(V) chain                           | COL5A2   | Fibrillar collagen        | 0.42           | 1.24                       | 0.74   | 0.75     | 0.57     | —                | 0.70            | 0.71         | 0.76  |
| Total fibrillar collagen                            |          |                           | 58.53          | 88.62                      | 96.45  | 97.92    | 96.59    | —                | 82.73           | 91.20        | 85.10 |
| Collagen alpha-1(VI) chain                          | COL6A1   | Matricellular             | 4.94           | 1.66                       | 0.15   | 0.42     | 0.88     | —                | 2.49            | 3.71         | 1.76  |
| Collagen alpha-1(XVIII) chain                       | COL18A1  | Matricellular             | 0.11           | 0.01                       | —      | —        | —        | —                | 0.01            | —            | 0.01  |
| Collagen alpha-2(VI) chain                          | COL6A2   | Matricellular             | 2.83           | 0.65                       | 0.03   | 0.06     | 0.06     | —                | 2.69            | 1.27         | 2.14  |
| Collagen alpha-3(VI) chain                          | COL6A3   | Matricellular             | 6.04           | 0.35                       | —      | —        | —        | —                | 1.01            | —            | 0.73  |
| Dermatopontin                                       | DPT      | Matricellular             | 0.51           | 0.26                       | 0.07   | 0.13     | 0.50     | —                | 0.16            | 0.21         | 0.17  |
| Emilin 1                                            | EMILIN1  | Matricellular             | 0.07           | —                          | —      | —        | —        | —                | —               | —            | —     |
| Fibronectin 1                                       | FN1      | Matricellular             | 1.25           | —                          | —      | —        | —        | —                | —               | —            | —     |
| Fibulin 3                                           | EFEMP1   | Matricellular             | 0.06           | —                          | —      | —        | —        | —                | —               | —            | —     |
| Fibulin 4                                           | EFEMP2   | Matricellular             | 0.01           | —                          | —      | —        | —        | —                | —               | —            | —     |
| Fibulin 5                                           | FBLN5    | Matricellular             | 1.06           | —                          | —      | —        | —        | —                | —               | —            | —     |
| Lumican                                             | LUM      | Matricellular             | 1.44           | 0.60                       | 0.06   | 0.05     | 0.03     | —                | 0.94            | 0.07         | 1.07  |
| Periostin                                           | POSTN    | Matricellular             | 0.07           | —                          | —      | —        | —        | —                | —               | —            | —     |
| Prolargin                                           | PRELP    | Matricellular             | 0.62           | 0.36                       | —      | —        | —        | —                | 0.52            | —            | 0.52  |
| TnxB protein                                        | TNXB     | Matricellular             | 0.01           | —                          | —      | —        | —        | —                | —               | —            | —     |
| Total matricellular proteins                        |          |                           | 19.02          | 3.89                       | 0.32   | 0.65     | 1.48     | —                | 7.83            | 5.27         | 6.39  |
| Biglycan                                            | BGN      | Structural ECM            | 0.20           | 0.05                       | —      | —        | —        | —                | 0.14            | —            | 0.12  |
| Decorin                                             | DCN      | Structural ECM            | 1.54           | 0.55                       | —      | —        | —        | —                | 1.44            | —            | 1.42  |
| Fibrillin 1                                         | FBN1     | Structural ECM            | 0.04           | 0.04                       | —      | 0.01     | 0.01     | —                | 0.39            | 0.16         | 0.27  |
| Fibrillin 2                                         | FBN2     | Structural ECM            | 0.22           | —                          | —      | —        | —        | —                | —               | —            | —     |
| Total structural ECM                                |          |                           | 2.00           | 0.64                       | —      | 0.01     | 0.01     | —                | 1.97            | 0.16         | 1.81  |

(continued)

SUPPLEMENTARY TABLE S1. (CONTINUED)

| <i>Protein</i>                 | <i>Gene</i> | <i>Functional classification</i> | <i>Fresh pancreas</i> | % (vs. Total ECM proteins) |               |                 |                 |                         |                        |                         |                        |                         |      |   |   |   |      |
|--------------------------------|-------------|----------------------------------|-----------------------|----------------------------|---------------|-----------------|-----------------|-------------------------|------------------------|-------------------------|------------------------|-------------------------|------|---|---|---|------|
|                                |             |                                  |                       | <i>1% Triton</i>           | <i>1% SDS</i> | <i>0.5% SDS</i> | <i>0.1% SDS</i> | <i>1% Triton-PI-Dec</i> | <i>0.1% SDS-PI-Dec</i> | <i>1% Triton-PI-Dec</i> | <i>0.1% SDS-PI-Dec</i> | <i>1% Triton-PI-Dec</i> |      |   |   |   |      |
| Collagen alpha-1(XII) chain    | COL12A1     | FACIT collagen                   | 0.10                  | —                          | —             | —               | —               | —                       | —                      | —                       | —                      | —                       | —    | — | — | — | —    |
| Collagen alpha-1(XIV) chain    | COL14A1     | FACIT collagen                   | 1.32                  | 0.01                       | —             | —               | —               | —                       | —                      | —                       | —                      | —                       | 0.08 | — | — | — | 0.05 |
| TOT FACIT collagen             |             |                                  | 1.42                  | 0.01                       | —             | —               | —               | —                       | —                      | —                       | —                      | —                       | 0.08 | — | — | — | 0.05 |
| Annexin A2                     | ANXA2       | Other ECM                        | 1.03                  | —                          | —             | —               | —               | —                       | —                      | —                       | —                      | —                       | —    | — | — | — | —    |
| Asporin                        | ASP1        | Other ECM                        | 0.16                  | 0.11                       | —             | —               | —               | —                       | —                      | —                       | —                      | —                       | 0.22 | — | — | — | 0.18 |
| Extracellular matrix protein 1 | ECM1        | Other ECM                        | —                     | —                          | —             | —               | —               | —                       | —                      | —                       | —                      | —                       | —    | — | — | — | —    |
| Galectin-1                     | LGALS1      | Other ECM                        | 0.17                  | —                          | —             | —               | —               | —                       | —                      | —                       | —                      | —                       | —    | — | — | — | —    |
| Galectin-3                     | LGALS3      | Other ECM                        | 0.05                  | —                          | —             | —               | —               | —                       | —                      | —                       | —                      | —                       | —    | — | — | — | —    |
| Mimectan/osteoglycin           | OGN         | Other ECM                        | 0.87                  | 0.30                       | —             | —               | —               | —                       | —                      | —                       | —                      | —                       | 0.36 | — | — | — | 0.37 |
| Total other ECMs               |             |                                  | 2.27                  | 0.41                       | —             | —               | —               | —                       | —                      | —                       | —                      | —                       | 0.58 | — | — | — | 0.55 |

\*indicates a different collagen isoform.  
ECM, extracellular matrix; PI, protease inhibitor; SDS, sodium dodecyl sulfate.
