# Supplementary material
Source: PubMed Central journal article supplement (PMC6306687)
Supplement: Supp_Table2.pdf [file Supp_Table2.pdf]

Supplementary Table S2. Top 20 Extracellular Matrix Proteins of Porcine Pancreatic Extracellular Matrix Hydrogels by Global Proteomic Analysis

| Protein                     | Gene   | Functional classification | Accession No. | 1% Triton | 1% SDS | 0.5% SDS | 0.1% SDS | 1% Triton-PI-Dec | 0.1% SDS-PI-Dec | 1% Triton-PI-Dec | 0.1% SDS-PI-Dec | 1% Triton-PI |
|-----------------------------|--------|---------------------------|---------------|-----------|--------|----------|----------|------------------|-----------------|------------------|-----------------|--------------|
| Collagen alpha-1(I) chain   | COL1A1 | Fibrillar collagen        | P02453        | 158       | 175    | 218      | 172      | 129              | 159             | 129              | 159             | 134          |
| Collagen alpha-2(I) chain   | COL1A2 | Fibrillar collagen        | F1SFA7        | 267       | 293    | 331      | 304      | 218              | 260             | 218              | 260             | 218          |
| Collagen alpha-1(III) chain | COL3A1 | Fibrillar collagen        | F1RYI8        | 180       | 203    | 259      | 169      | 141              | 161             | 141              | 161             | 128          |
| Collagen alpha-1(V) chain   | COL5A1 | Fibrillar collagen        | F1S021        | 20        | 32     | 27       | 21       | 15               | 17              | 15               | 17              | 18           |
| Collagen alpha-1(I) chain   | COL1A1 | Fibrillar collagen        | P02453        | 158       | 175    | 218      | 172      | 129              | 159             | 129              | 159             | 134          |
| Collagen alpha-2(V) chain   | COL5A2 | Fibrillar collagen        | F1RXXW0       | 22        | 24     | 30       | 21       | 19               | 18              | 19               | 18              | 18           |
| Collagen alpha-1(IV) chain  | COL4A1 | Basement membrane         | F1RLM1        | 39        | 31     | 33       | 55       | 34               | 37              | 34               | 37              | 35           |
| Collagen alpha-2(IV) chain  | COL4A2 | Basement membrane         | F1RLI9        | 61        | 50     | 57       | 79       | 51               | 79              | 51               | 79              | 48           |
| Collagen alpha-6(IV) chain  | COL4A6 | Basement membrane         | F1RLI9        | 3         | 5      | 8        | 12       | 4                | 10              | 4                | 10              | 6            |
| Laminin alpha-4             | LAMA4  | Basement membrane         | F1RZM4        | 4         | 0      | 0        | 0        | 21               | 0               | 21               | 0               | 18           |
| Laminin beta-1              | LAMB1  | Basement membrane         | F1SAE9        | 11        | 0      | 0        | 2        | 37               | 11              | 37               | 11              | 32           |
| Laminin beta-2              | LAMB2  | Basement membrane         | F1SPT5        | 11        | 0      | 0        | 0        | 3                | 3               | 37               | 3               | 34           |
| Laminin gamma-1             | LAMC1  | Basement membrane         | F1S663        | 26        | 4      | 7        | 6        | 60               | 16              | 60               | 16              | 57           |
| Nidogen-2                   | NID2   | Basement membrane         | F1SFF3        | 7         | 0      | 0        | 0        | 23               | 5               | 23               | 5               | 18           |
| Perlecan                    | HSPG2  | Basement membrane         | F1SU03        | 8         | 0      | 2        | 2        | 25               | 6               | 25               | 6               | 19           |
| Collagen alpha-1(VI) chain  | COL6A1 | Matricellular             | I3LS72        | 10        | 11     | 6        | 5        | 17               | 31              | 17               | 31              | 21           |
| Collagen alpha-2(VI) chain  | COL6A2 | Matricellular             | I3LQ84        | 38        | 27     | 20       | 18       | 55               | 60              | 55               | 60              | 57           |
| Collagen alpha-3(VI) chain  | COL6A3 | Matricellular             | I3LUR7        | 81        | 27     | 23       | 21       | 139              | 95              | 139              | 95              | 136          |
| Decorin                     | DCN    | Structural ECM            | PGS2_PIG      | 12        | 3      | 0        | 2        | 16               | 5               | 16               | 5               | 17           |
| Fibrillin 1                 | FBN1   | Structural ECM            | FBN1_PIG      | 18        | 25     | 23       | 17       | 86               | 90              | 86               | 90              | 88           |

Table represents top 20 proteins identified based on the number of unique peptide spectral matches from global LC-MS/MS for a given protein. LC-MS/MS, liquid chromatography/tandem mass spectrometry.
